# Supplementary material for: Morphology dependent photoinduced electron transfer from N,N-dimethylaniline to semiconductor cadmium sulfide
Source: Royal Society of Chemistry journal article supplement (doi:10.1039/c4ra05498a), 2014-08-06
Supplement: c4ra05498a1.pdf [file c4ra05498a1.pdf]

## **Morphology dependent photo induced electron transfer from N, N Dimethylaniline to semiconductor Cadmium Sulfide**

Sankalpita Chakrabarty,<sup>a</sup> Harveen Kaur,<sup>b</sup> Tanusri Pal,<sup>c</sup> Soumitra Kar,<sup>d</sup> Surajit Ghosh<sup>a,\*</sup> and Subhadip Ghosh<sup>b,\*</sup>

<sup>a</sup>Department of Physics and Technophysics, Vidyasagar University, Midnapore 721102, India  
\*E-mail: surajit@mail.vidyasagar.ac.in

<sup>b</sup>School of Chemical Sciences, National Institute of Science Education and Research, Bhubaneswar 751 005, India  
\*E-mail: sghosh@niser.ac.in

<sup>c</sup>Department of Physics, Midnapore College, Midnapore 721101, India

<sup>d</sup>Department of Applied Science, Haldia Institute of Technology, Haldia 721657, India

Table of contents

I. Figures

page 2-3

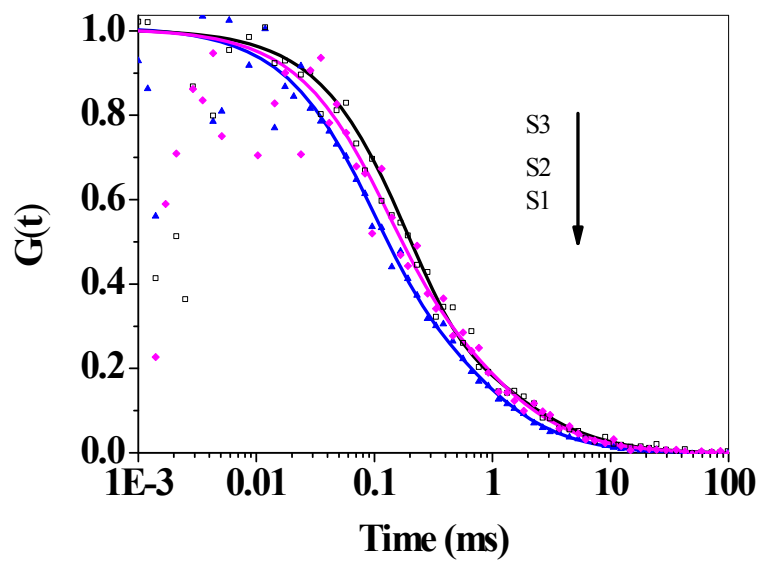

**Fig. S1:** Normalized fluorescence autocorrelation curves of CdS nanomaterials (sample S1, S2 and S3) in isopropanol ( $\lambda_{\text{ex}}=405$  nm). The points denote the actual values of  $G(t)$  and the solid line denotes the best fit.

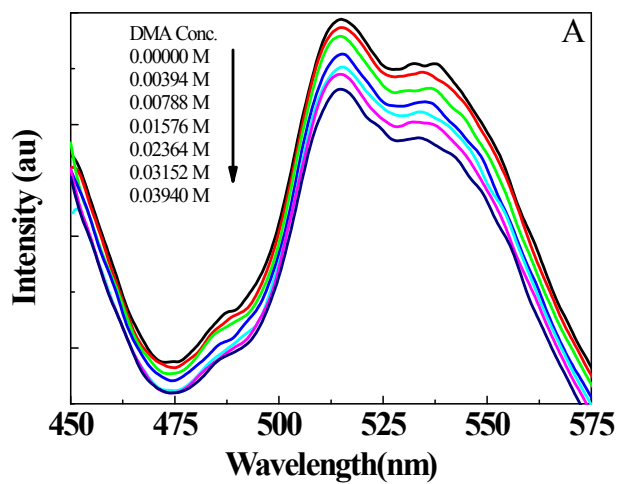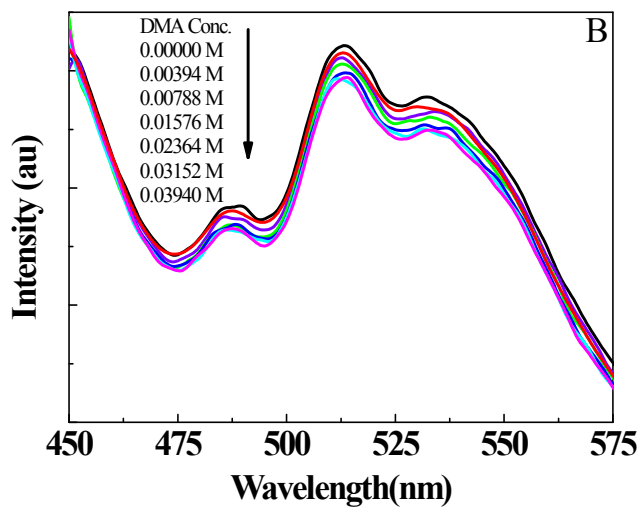

**Fig. S2:** Steady state emission spectra of sample S1 (A) and sample S2 (B) in isopropanol solvent at different DMA concentrations ( $\lambda_{\text{ex}}=375$  nm).
